# Supplementary material
Source: Research Square preprint supplement (doi:10.21203/rs.3.rs-9276822/v1)
Supplement: Supplementary file 1 [file 507c9aebff2a9272b713f22e.docx]

**Supplementary Material**

1. **TaqMan diagnostic assays**

| ***Year*** | ***Varroa Population*** | ***Bioassay mortality at LC 90*** | ***Genotype (N87S)*** | | | |
| --- | --- | --- | --- | --- | --- | --- |
|  |  |  | *SS* | *SR* | *RR* | *Tot* |
| *2019* | *1*(D020819)* | ***100*** | *98* | *0* | *0* | *98* |
| *2019* | *2* (Sl120819)* | ***91*** | *79* | *0* | *0* | *79* |
| *2019* | *3*(C020819)* | ***91*** | *20* | *0* | *1* | *21* |
| *2020* | *4 (LA)* | ***77*** | *47* | *4* | *4* | *55* |
| *2020* | *5 (BV)* | ***71*** | *55* | *13* | *39* | *107* |
| *2023* | *6 (R36290)* | ***62*** | *52* | *0* | *0* | *52* |
| *2020* | *7 (R17)* | ***55*** | *96* | *0* | *0* | *96* |
| *2020* | *8 (MM4)* | ***46*** | *34* | *0* | *0* | *34* |
| *2020* | *9 (Gali20.22)* | ***44*** | *13* | *1* | *16* | *30* |
| *2020* | *10 (Gali20.1)* | ***41*** | *28* | *2* | *17* | *47* |
| *2023* | *11 (R18210)* | ***31*** | *6* | *2* | *49* | *57* |
| *2023* | *12 (R37310)* | ***29*** | *43* | *3* | *4* | *50* |
| *2023* | *13 (R37460)* | ***25*** | *48* | *1* | *11* | *60* |
| *2023* | *14 (R45190)* | ***23*** | *41* | *4* | *4* | *49* |
| *2020* | *15 (Gali20.24)* | ***20*** | *22* | *1* | *16* | *39* |
| *2020* | *16 (Gali20.2)* | ***20*** | *41* | *0* | *1* | *42* |
| *2023* | *17 (R70230)* | ***19*** | *45* | *1* | *3* | *49* |
| *2023* | *18 (R39140)* | ***13*** | *8* | *0* | *11* | *19* |
| *2020* | *19 (Gali20.15)* | ***10*** | *13* | *1* | *9* | *23* |
| *2023* | *20** (70150)* | ***8*** | *14* | *1* | *8* | *23* |
| *2022* | *21** (SMA45110)* | ***9*** | *4* | *1* | *10* | *15* |
| *2022* | *22** (91400)* | ***8*** | *2* | *0* | *21* | *23* |
| *2020* | *23*** (SP3)* | ***7*** | *32* | *1* | *26* | *59* |
