# Supplementary material
Source: Research Square preprint supplement (doi:10.21203/rs.3.rs-9276822/v1)
Supplement: Supplementary file 2 [file c0a592cd74cd68144b0207ca.pdf]

| Sampling date | Postal code | Nb hive sampled | Date test | Compound | Nb varroa | Nb dead varroas | Avg mortality | Corrected mortality | Standard deviation |
|---------------|-------------|-----------------|-----------|----------|-----------|-----------------|---------------|---------------------|--------------------|
| <b>2018</b>   |             |                 |           |          |           |                 |               |                     |                    |
| 2018          | 17 140 - A  |                 |           | Amitraz  | -         | -               | -             | 0,70                | -                  |
| 2018          | 17 140 - B  |                 |           | Amitraz  | -         | -               | -             | 0,55                | -                  |
| 2018          | 17 140 - C  |                 |           | Amitraz  | -         | -               | -             | 0,60                | -                  |
| 2018          | 29 000 - A  |                 |           | Amitraz  | -         | -               | -             | 0,56                | -                  |
| 2018          | 29 000 - B  |                 |           | Amitraz  | -         | -               | -             | 0,89                | -                  |
| 2018          | 42 110      |                 |           | Amitraz  | -         | -               | -             | 0,90                | -                  |
| 2018          | 49 000      |                 |           | Amitraz  | -         | -               | -             | 0,88                | -                  |
| 2018          | 73 000      |                 |           | Amitraz  | -         | -               | -             | 0,44                | -                  |
| 2018          | 97 315      |                 |           | Amitraz  | -         | -               | -             | 0,52                | -                  |
| <b>2019</b>   |             |                 |           |          |           |                 |               |                     |                    |
| 2019          | 1 160       |                 |           | Amitraz  | -         | -               | -             | 0,72                | -                  |
| 2019          | 1 260       |                 |           | Amitraz  | -         | -               | -             | 0,67                | -                  |
| 2019          | 15 160      |                 |           | Amitraz  | -         | -               | -             | 0,57                | -                  |
| 2019          | 26 190      |                 |           | Amitraz  | -         | -               | -             | 0,52                | -                  |
| 2019          | 38 260      |                 |           | Amitraz  | -         | -               | -             | 0,44                | -                  |
| 2019          | 38 550      |                 |           | Amitraz  | -         | -               | -             | 0,57                | -                  |
| 2019          | 38 690 - A  |                 |           | Amitraz  | -         | -               | -             | 0,72                | -                  |
| 2019          | 38 690 - B  |                 |           | Amitraz  | -         | -               | -             | 0,05                | -                  |
| 2019          | 38 790      |                 |           | Amitraz  | -         | -               | -             | 0,05                | -                  |
| 2019          | 42 560      |                 |           | Amitraz  | -         | -               | -             | 0,96                | -                  |
| 2019          | 42 600      |                 |           | Amitraz  | -         | -               | -             | 0,27                | -                  |
| 2019          | 43 100      |                 |           | Amitraz  | -         | -               | -             | 0,72                | -                  |
| 2019          | 43 150      |                 |           | Amitraz  | -         | -               | -             | 0,74                | -                  |
| 2019          | 44 000      |                 |           | Amitraz  | -         | -               | -             | 0,96                | -                  |
| 2019          | 44 320      |                 |           | Amitraz  | -         | -               | -             | 0,54                | -                  |
| 2019          | 44 460      |                 |           | Amitraz  | -         | -               | -             | 1,00                | -                  |
| 2019          | 49 112      |                 |           | Amitraz  | -         | -               | -             | 0,70                | -                  |
| 2019          | 56 230      |                 |           | Amitraz  | -         | -               | -             | 0,91                | -                  |
| 2019          | 63 260      |                 |           | Amitraz  | -         | -               | -             | 0,63                | -                  |
| 2019          | 63 320      |                 |           | Amitraz  | -         | -               | -             | 0,90                | -                  |
| 2019          | 63 420      |                 |           | Amitraz  | -         | -               | -             | 0,68                | -                  |
| 2019          | 63 830      |                 |           | Amitraz  | -         | -               | -             | 0,57                | -                  |
| 2019          | 69 210      |                 |           | Amitraz  | -         | -               | -             | 0,91                | -                  |
| 2019          | 74 210      |                 |           | Amitraz  | -         | -               | -             | 0,20                | -                  |
| <b>2021</b>   |             |                 |           |          |           |                 |               |                     |                    |
| 2020          | 17 000      |                 |           | Amitraz  | -         | -               | -             | 0,38                | -                  |
| 2020          | 17 140      |                 |           | Amitraz  | -         | -               | -             | 0,38                | -                  |
| 2020          | 26 120 - A  |                 |           | Amitraz  | -         | -               | -             | 0,24                | -                  |
| 2020          | 26 120 - B  |                 |           | Amitraz  | -         | -               | -             | 0,24                | -                  |
| 2020          | 26 230 - A  |                 |           | Amitraz  | -         | -               | -             | 0,92                | -                  |
| 2020          | 26 230 - B  |                 |           | Amitraz  | -         | -               | -             | 0,92                | -                  |
| 2020          | 26 300 - A  |                 |           | Amitraz  | -         | -               | -             | 0,67                | -                  |
| 2020          | 26 300 - B  |                 |           | Amitraz  | -         | -               | -             | 0,67                | -                  |
| 2020          | 33 690 - A  |                 |           | Amitraz  | -         | -               | -             | 0,60                | -                  |
| 2020          | 33 690 - B  |                 |           | Amitraz  | -         | -               | -             | 0,60                | -                  |
| 2020          | 4 150 - A   |                 |           | Amitraz  | -         | -               | -             | 0,71                | -                  |
| 2020          | 4 150 - B   |                 |           | Amitraz  | -         | -               | -             | 0,71                | -                  |
| 2020          | 4 210 - A   |                 |           | Amitraz  | -         | -               | -             | 0,30                | -                  |
| 2020          | 4 210 - B   |                 |           | Amitraz  | -         | -               | -             | 0,30                | -                  |
| 2020          | 4 410 - A   |                 |           | Amitraz  | -         | -               | -             | 0,77                | -                  |
| 2020          | 4 410 - B   |                 |           | Amitraz  | -         | -               | -             | 0,77                | -                  |
| 2020          | 4 700 - A   |                 |           | Amitraz  | -         | -               | -             | 0,60                | -                  |
| 2020          | 4 700 - B   |                 |           | Amitraz  | -         | -               | -             | 0,60                | -                  |
| 2020          | 49 000 - A  |                 |           | Amitraz  | -         | -               | -             | 0,50                | -                  |

|             |            |   |            |         |     |    |      |       |      |
|-------------|------------|---|------------|---------|-----|----|------|-------|------|
| 2020        | 49 000 - B |   |            | Amitraz | -   | -  | -    | 0,50  | -    |
| 2020        | 63 170 - A |   |            | Amitraz | -   | -  | -    | 0,28  | -    |
| 2020        | 63 170 - B |   |            | Amitraz | -   | -  | -    | 0,69  | -    |
| 2020        | 63 170 - C |   |            | Amitraz | -   | -  | -    | 0,61  | -    |
| 2020        | 63 170 - D |   |            | Amitraz | -   | -  | -    | 0,28  | -    |
| 2020        | 63 170 - E |   |            | Amitraz | -   | -  | -    | 0,69  | -    |
| 2020        | 63 170 - F |   |            | Amitraz | -   | -  | -    | 0,61  | -    |
| 2020        | 7 800 - A  |   |            | Amitraz | -   | -  | -    | 0,40  | -    |
| 2020        | 7 800 - B  |   |            | Amitraz | -   | -  | -    | 0,40  | -    |
| 2020        | 81 000 - A |   |            | Amitraz | -   | -  | -    | 0,07  | -    |
| 2020        | 81 000 - B |   |            | Amitraz | -   | -  | -    | 0,07  | -    |
| 2020        | 81 150 - A |   |            | Amitraz | -   | -  | -    | 0,51  | -    |
| 2020        | 81 150 - B |   |            | Amitraz | -   | -  | -    | 0,04  | -    |
| 2020        | 84 390- A  |   |            | Amitraz | -   | -  | -    | 0,77  | -    |
| 2020        | 84 390 - B |   |            | Amitraz | -   | -  | -    | 0,77  | -    |
| 2020        | 9 240 - A  |   |            | Amitraz | -   | -  | -    | 0,88  | -    |
| 2020        | 9 240 - B  |   |            | Amitraz | -   | -  | -    | 0,88  | -    |
| <b>2022</b> |            |   |            |         |     |    |      |       |      |
| 21/07/2022  | 17140      | 1 | 21/07/2022 | Control | 48  | 2  | 0,04 |       | 0,05 |
| 21/07/2022  | 17140      | 1 | 21/07/2022 | Amitraz | 48  | 13 | 0,27 | 0,24  | 0,20 |
| 01/08/2022  | 25200 - A  | 4 | 02/08/2022 | Control | 60  | 30 | 0,50 |       | 0,04 |
| 01/08/2022  | 25200 - A  | 4 | 02/08/2022 | Amitraz | 120 | 50 | 0,42 | -0,17 | 0,05 |
| 01/08/2022  | 25200 - B  | 4 | 03/08/2022 | Control | 60  | 6  | 0,10 |       | 0,07 |
| 01/08/2022  | 25200 - B  | 4 | 03/08/2022 | Amitraz | 60  | 27 | 0,45 | 0,39  | 0,08 |
| 02/08/2022  | 71350      | 4 | 03/08/2022 | Control | 20  | 6  | 0,30 |       | 0,14 |
| 02/08/2022  | 71350      | 4 | 03/08/2022 | Amitraz | 20  | 17 | 0,85 | 0,79  | 0,21 |
| 02/08/2022  | 25170      | 4 | 03/08/2022 | Amitraz | 20  | 4  | 0,20 | -0,14 | 0,00 |
| 01/08/2022  | 71240      | 4 | 04/08/2022 | Control | 59  | 8  | 0,14 |       | 0,05 |
| 01/08/2022  | 71240      | 4 | 04/08/2022 | Amitraz | 58  | 28 | 0,48 | 0,40  | 0,06 |
| 08/08/2022  | 45140      | 3 | 09/08/2022 | Control | 120 | 17 | 0,14 |       | 0,14 |
| 08/08/2022  | 45140      | 3 | 09/08/2022 | Amitraz | 60  | 8  | 0,13 | -0,01 | 0,05 |
| 08/08/2022  | 45110      | 3 | 09/08/2022 | Amitraz | 24  | 4  | 0,17 | 0,03  | 0,02 |
| 08/08/2022  | 41172      | 3 | 09/08/2022 | Amitraz | 60  | 19 | 0,32 | 0,20  | 0,15 |
| 08/08/2022  | 21120      | 2 | 10/08/2022 | Amitraz | 14  | 14 | 1,00 | 1,00  | NA   |
| 08/08/2022  | 21610      | 2 | 10/08/2022 | Amitraz | 63  | 21 | 0,33 | 0,22  | 0,34 |
| 08/08/2022  | 39100      | 2 | 09/08/2022 | Control | 57  | 5  | 0,09 |       | 0,10 |
| 08/08/2022  | 39100      | 2 | 09/08/2022 | Amitraz | 58  | 10 | 0,17 | 0,10  | 0,17 |
| 16/08/2022  | 91400      | 1 | 17/08/2022 | Control | 59  | 8  | 0,14 |       | 0,06 |
| 16/08/2022  | 91400      | 1 | 17/08/2022 | Amitraz | 59  | 5  | 0,08 | -0,06 | 0,08 |
| 16/08/2022  | 28140      | 3 | 17/08/2022 | Control | 10  | 1  | 0,10 |       | NA   |
| 16/08/2022  | 45110      | 3 | 17/08/2022 | Control | 59  | 8  | 0,14 |       | 0,06 |
| 16/08/2022  | 45110      | 3 | 17/08/2022 | Amitraz | 45  | 4  | 0,09 | -0,05 | 0,10 |
| 21/08/2022  | 39230      | 4 | 24/08/2022 | Control | 75  | 3  | 0,04 |       | 0,07 |
| 21/08/2022  | 39230      | 4 | 24/08/2022 | Amitraz | 60  | 36 | 0,60 | 0,58  | 0,08 |
| 23/08/2022  | 70150      | 2 | 25/08/2022 | Control | 30  | 2  | 0,07 |       | 0,00 |
| 23/08/2022  | 70150      | 2 | 25/08/2022 | Amitraz | 44  | 3  | 0,07 | 0,00  | 0,07 |
| 29/08/2022  | 37800      | 3 | 30/08/2022 | Control | 89  | 6  | 0,07 |       | 0,07 |
| 29/08/2022  | 37800      | 3 | 30/08/2022 | Amitraz | 60  | 6  | 0,10 | 0,03  | 0,09 |
| 29/08/2022  | 36210      | 3 | 30/08/2022 | Control | 60  | 6  | 0,10 |       | 0,07 |
| 29/08/2022  | 36210      | 3 | 30/08/2022 | Amitraz | 60  | 30 | 0,50 | 0,44  | 0,09 |
| 26/09/2022  | 36290      | 3 | 27/09/2022 | Control | 60  | 10 | 0,17 |       | 0,04 |
| 26/09/2022  | 36290      | 3 | 27/09/2022 | Amitraz | 60  | 18 | 0,30 | 0,16  | 0,17 |
| 17/10/2022  | 12200      | 3 | 18/10/2022 | Control | 20  | 7  | 0,35 |       | 0,05 |
| 17/10/2022  | 12200      | 3 | 18/10/2022 | Amitraz | 25  | 19 | 0,76 | 0,63  | 0,05 |
| <b>2023</b> |            |   |            |         |     |    |      |       |      |
| 28/03/2023  | 52400      | 5 | 29/03/2023 | Control | 17  | 4  | 0,24 |       | NA   |
| 28/03/2023  | 52400      | 5 | 29/03/2023 | Amitraz | 30  | 5  | 0,17 | -0,09 | 0,12 |
| 22/05/2023  | 97410      | 3 | 26/05/2023 | Control | 60  | 37 | 0,62 |       | 0,08 |
| 22/05/2023  | 97410      | 3 | 26/05/2023 | Amitraz | 60  | 57 | 0,95 | 0,87  | 0,03 |

|             |       |    |            |         |     |    |      |       |      |
|-------------|-------|----|------------|---------|-----|----|------|-------|------|
| 22/05/2023  | 97480 | 3  | 26/05/2023 | Control | 60  | 26 | 0,43 |       | 0,14 |
| 22/05/2023  | 97480 | 3  | 26/05/2023 | Amitraz | 60  | 42 | 0,70 | 0,47  | 0,19 |
| 13/06/2023  | 37460 | 3  | 14/06/2023 | Control | 61  | 7  | 0,11 |       | 0,03 |
| 13/06/2023  | 37460 | 3  | 14/06/2023 | Amitraz | 61  | 15 | 0,25 | 0,15  | 0,06 |
| 13/06/2023  | 36290 | 3  | 15/06/2023 | Control | 59  | 11 | 0,19 |       | 0,10 |
| 13/06/2023  | 36290 | 3  | 15/06/2023 | Amitraz | 60  | 37 | 0,62 | 0,53  | 0,14 |
| 26/06/2023  | 37310 | 3  | 28/06/2023 | Control | 60  | 2  | 0,03 |       | 0,04 |
| 26/06/2023  | 37310 | 3  | 28/06/2023 | Amitraz | 52  | 15 | 0,29 | 0,26  | 0,07 |
| 04/07/2023  | 45340 | 3  | 05/07/2023 | Control | 63  | 14 | 0,22 |       | 0,15 |
| 04/07/2023  | 45340 | 3  | 05/07/2023 | Amitraz | 62  | 52 | 0,84 | 0,79  | 0,12 |
| 10/07/2023  | 18140 | 3  | 13/07/2023 | Control | 72  | 22 | 0,31 |       | 0,22 |
| 10/07/2023  | 18140 | 3  | 13/07/2023 | Amitraz | 64  | 49 | 0,77 | 0,66  | 0,18 |
| 10/07/2023  | 45240 | 3  | 13/07/2023 | Control | 26  | 4  | 0,15 |       | 0,06 |
| 10/07/2023  | 45240 | 3  | 13/07/2023 | Amitraz | 72  | 14 | 0,19 | 0,05  | 0,07 |
| 18/07/2023  | 18210 | 3  | 19/07/2023 | Control | 58  | 11 | 0,19 |       | 0,24 |
| 18/07/2023  | 18210 | 3  | 19/07/2023 | Amitraz | 61  | 19 | 0,31 | 0,15  | 0,09 |
| 18/07/2023  | 88140 | 5  | 20/07/2023 | Control | 68  | 16 | 0,24 |       | 0,08 |
| 18/07/2023  | 88140 | 5  | 20/07/2023 | Amitraz | 71  | 36 | 0,51 | 0,36  | 0,31 |
| 18/07/2023  | 68240 | 8  | 20/07/2023 | Control | 69  | 15 | 0,22 |       | 0,18 |
| 18/07/2023  | 68240 | 8  | 20/07/2023 | Amitraz | 80  | 57 | 0,71 | 0,63  | 0,12 |
| 31/07/2023  | 21120 | 2  | 01/08/2023 | Control | 60  | 6  | 0,10 |       | 0,13 |
| 31/07/2023  | 21120 | 2  | 01/08/2023 | Amitraz | 47  | 10 | 0,21 | 0,13  | 0,25 |
| 31/07/2023  | 21440 | 1  | 02/08/2023 | Amitraz | 51  | 20 | 0,39 | 0,37  | 0,10 |
| 01/08/2023  | 52330 | 7  | 02/08/2023 | Control | 51  | 2  | 0,04 |       | 0,08 |
| 01/08/2023  | 52330 | 7  | 02/08/2023 | Amitraz | 50  | 11 | 0,22 | 0,19  | 0,15 |
| 01/08/2023  | 52310 | 6  | 02/08/2023 | Amitraz | 61  | 20 | 0,33 | 0,30  | 0,06 |
| 07/08/2023  | 18240 | 3  | 08/08/2023 | Control | 72  | 16 | 0,22 |       | 0,14 |
| 07/08/2023  | 18240 | 3  | 08/08/2023 | Amitraz | 61  | 11 | 0,18 | -0,05 | 0,06 |
| 07/08/2023  | 37800 | 3  | 08/08/2023 | Control | 78  | 6  | 0,08 |       | 0,03 |
| 07/08/2023  | 37800 | 3  | 08/08/2023 | Amitraz | 69  | 5  | 0,07 | 0,00  | 0,06 |
| 07/08/2023  | 70230 | 2  | 08/08/2023 | Amitraz | 48  | 9  | 0,19 | NA    | 0,14 |
| 07/08/2023  | 39320 | 2  | 09/08/2023 | Amitraz | 19  | 4  | 0,21 | NA    | 0,02 |
| 05/08/2023  | 39140 | 2  | 09/08/2023 | Control | 24  | 4  | 0,17 |       | 0,12 |
| 05/08/2023  | 39140 | 2  | 09/08/2023 | Amitraz | 24  | 3  | 0,13 | -0,05 | 0,18 |
| 07/08/2023  | 25200 | 2  | 09/08/2023 | Amitraz | 54  | 8  | 0,15 | 0,10  | 0,07 |
| 07/08/2023  | 70150 | 2  | 09/08/2023 | Control | 24  | 3  | 0,13 |       | 0,06 |
| 07/08/2023  | 70150 | 2  | 09/08/2023 | Amitraz | 52  | 7  | 0,13 | 0,01  | 0,09 |
| 07/08/2023  | 25550 | 2  | 09/08/2023 | Control | 69  | 4  | 0,06 |       | 0,09 |
| 07/08/2023  | 25550 | 2  | 09/08/2023 | Amitraz | 77  | 19 | 0,25 | 0,20  | 0,15 |
| 09/08/2023  | 17140 | 1  | 09/08/2023 | Control | 60  | 5  | 0,08 |       | 0,08 |
| 09/08/2023  | 17140 | 1  | 09/08/2023 | Amitraz | 151 | 24 | 0,16 | 0,08  | 0,08 |
| 21/08/2023  | 88370 | 4  | 22/08/2023 | Control | 60  | 8  | 0,13 |       | 0,19 |
| 21/08/2023  | 88370 | 4  | 22/08/2023 | Amitraz | 64  | 26 | 0,41 | 0,31  | 0,18 |
| 28/08/2023  | 67300 | 19 | 30/08/2023 | Control | 81  | 23 | 0,28 |       | 0,11 |
| 28/08/2023  | 67300 | 19 | 30/08/2023 | Amitraz | 83  | 59 | 0,71 | 0,60  | 0,19 |
| 04/09/2023  | 45190 | 3  | 07/09/2023 | Control | 60  | 10 | 0,17 |       | 0,12 |
| 04/09/2023  | 45190 | 3  | 07/09/2023 | Amitraz | 60  | 14 | 0,23 | 0,08  | 0,09 |
| 12/09/2023  | 45300 | 3  | 13/09/2023 | Control | 75  | 8  | 0,11 |       | 0,15 |
| 12/09/2023  | 45300 | 3  | 13/09/2023 | Amitraz | 90  | 17 | 0,19 | 0,09  | 0,11 |
| 08/10/2023  | 47140 | 1  | 10/10/2023 | Control | 59  | 16 | 0,27 |       | 0,07 |
| 08/10/2023  | 47140 | 1  | 10/10/2023 | Amitraz | 62  | 18 | 0,29 | 0,03  | 0,03 |
| 16/10/2023  | 58240 | 2  | 18/10/2023 | Control | 56  | 14 | 0,25 |       | 0,15 |
| 16/10/2023  | 58240 | 2  | 18/10/2023 | Amitraz | 56  | 30 | 0,54 | 0,38  | 0,13 |
| <b>2024</b> |       |    |            |         |     |    |      |       |      |
| 01/07/2024  | 88370 | 5  | 02/07/2024 | Control | 60  | 5  | 0,08 |       | 0,08 |
| 01/07/2024  | 88370 | 5  | 02/07/2024 | Amitraz | 60  | 12 | 0,20 | 0,13  | 0,08 |
| 01/07/2024  | 88270 | 4  | 02/07/2024 | Amitraz | 60  | 5  | 0,08 | 0,00  | 0,08 |
| 03/07/2024  | 66510 | 2  | 04/07/2024 | Control | 60  | 4  | 0,07 |       | 0,00 |
| 03/07/2024  | 66510 | 2  | 04/07/2024 | Amitraz | 60  | 4  | 0,07 | 0,00  | 0,05 |

|             |           |   |            |         |     |    |      |       |      |
|-------------|-----------|---|------------|---------|-----|----|------|-------|------|
| 07/07/2024  | 30450     | 2 | 11/07/2024 | Control | 45  | 2  | 0,04 |       | 0,04 |
| 07/07/2024  | 30450     | 2 | 11/07/2024 | Amitraz | 60  | 1  | 0,02 | -0,03 | 0,03 |
| 09/07/2024  | 88320     | 6 | 11/07/2024 | Control | 15  | 0  | 0,00 |       | NA   |
| 09/07/2024  | 88320     | 6 | 11/07/2024 | Amitraz | 45  | 6  | 0,13 | 0,13  | 0,18 |
| 15/07/2024  | 52400     | 5 | 17/07/2024 | Control | 60  | 3  | 0,05 |       | 0,20 |
| 15/07/2024  | 52400     | 5 | 17/07/2024 | Amitraz | 60  | 41 | 0,68 | 0,67  | 0,11 |
| 15/07/2024  | 55190     | 6 | 17/07/2024 | Control | 60  | 3  | 0,05 |       | 0,06 |
| 15/07/2024  | 55190     | 6 | 17/07/2024 | Amitraz | 60  | 38 | 0,63 | 0,61  | 0,23 |
| 21/07/2024  | 30300     | 3 | 23/07/2024 | Control | 60  | 18 | 0,30 |       | 0,16 |
| 21/07/2024  | 30300     | 3 | 23/07/2024 | Amitraz | 60  | 49 | 0,82 | 0,74  | 0,14 |
| 22/07/2024  | 52330     | 5 | 25/07/2024 | Control | 60  | 8  | 0,13 |       | 0,09 |
| 22/07/2024  | 52330     | 5 | 25/07/2024 | Amitraz | 60  | 30 | 0,50 | 0,42  | 0,23 |
| 22/07/2024  | 52320     | 5 | 25/07/2024 | Control | 60  | 19 | 0,32 |       | 0,17 |
| 22/07/2024  | 52320     | 5 | 25/07/2024 | Amitraz | 60  | 33 | 0,55 | 0,34  | 0,23 |
| 29/07/2024  | 68500     | 7 | 30/07/2024 | Control | 30  | 7  | 0,23 |       | 0,05 |
| 29/07/2024  | 68500     | 7 | 30/07/2024 | Amitraz | 60  | 41 | 0,68 | 0,59  | 0,14 |
| 24/07/2024  | 17140     | 3 | 24/07/2024 | Control | 30  | 2  | 0,07 |       | 0,00 |
| 24/07/2024  | 17140     | 3 | 24/07/2024 | Amitraz | 45  | 36 | 0,80 | 0,79  | 0,07 |
| 29/07/2024  | 21200     | 6 | 31/07/2024 | Control | 60  | 2  | 0,03 |       | 0,07 |
| 29/07/2024  | 21200     | 6 | 31/07/2024 | Amitraz | 60  | 50 | 0,83 | 0,83  | 0,13 |
| 05/08/2024  | 88270     | 6 | 07/08/2024 | Control | 60  | 5  | 0,08 |       | 0,06 |
| 05/08/2024  | 88270     | 6 | 07/08/2024 | Amitraz | 60  | 20 | 0,33 | 0,27  | 0,09 |
| 05/08/2024  | 88320     | 6 | 08/08/2024 | Control | 30  | 3  | 0,10 |       | 0,05 |
| 05/08/2024  | 88320     | 6 | 08/08/2024 | Amitraz | 60  | 20 | 0,33 | 0,26  | 0,18 |
| 05/08/2024  | 88450     | 6 | 08/08/2024 | Control | 60  | 6  | 0,10 |       | 0,07 |
| 05/08/2024  | 88450     | 6 | 08/08/2024 | Amitraz | 60  | 29 | 0,48 | 0,43  | 0,06 |
| 05/08/2024  | 67220     | 6 | 08/08/2024 | Control | 60  | 10 | 0,17 |       | 0,14 |
| 05/08/2024  | 67220     | 6 | 08/08/2024 | Amitraz | 60  | 21 | 0,35 | 0,22  | 0,03 |
| 05/08/2024  | 21200     | 6 | 08/08/2024 | Control | 40  | 3  | 0,08 |       | 0,07 |
| 12/08/2024  | 30420     | 2 | 13/08/2024 | Control | 60  | 2  | 0,03 |       | 0,04 |
| 12/08/2024  | 30420     | 2 | 13/08/2024 | Amitraz | 60  | 39 | 0,65 | 0,64  | 0,19 |
| 12/08/2024  | 57480     | 5 | 13/08/2024 | Control | 60  | 6  | 0,10 |       | 0,04 |
| 12/08/2024  | 57480     | 5 | 13/08/2024 | Amitraz | 60  | 16 | 0,27 | 0,19  | 0,09 |
| 12/08/2024  | 88340     | 5 | 16/08/2024 | Control | 74  | 9  | 0,12 |       | 0,03 |
| 12/08/2024  | 88340     | 5 | 16/08/2024 | Amitraz | 60  | 38 | 0,63 | 0,58  | 0,21 |
| 27/08/2024  | 17138     | 1 | 27/08/2024 | Control | 59  | 9  | 0,15 |       | 0,06 |
| 27/08/2024  | 17138     | 1 | 27/08/2024 | Amitraz | 60  | 42 | 0,70 | 0,65  | 0,07 |
| 03/09/2024  | 71270     | 2 | 05/09/2024 | Control | 62  | 14 | 0,23 |       | 0,09 |
| 03/09/2024  | 71270     | 2 | 05/09/2024 | Amitraz | 61  | 59 | 0,97 | 0,96  | 0,04 |
| 18/09/2024  | 12160     | 1 | 20/09/2024 | Control | 60  | 12 | 0,20 |       | 0,09 |
| 18/09/2024  | 12160     | 1 | 20/09/2024 | Amitraz | 60  | 25 | 0,42 | 0,27  | 0,34 |
| 14/10/2024  | 44320 - A | 1 | 16/10/2024 | Control | 60  | 15 | 0,25 |       | 0,15 |
| 14/10/2024  | 44320 - A | 1 | 16/10/2024 | Amitraz | 64  | 34 | 0,53 | 0,38  | 0,10 |
| 14/10/2024  | 44320 - B | 1 | 16/10/2024 | Control | 60  | 9  | 0,15 |       | 0,08 |
| 14/10/2024  | 44320 - B | 1 | 16/10/2024 | Amitraz | 64  | 51 | 0,80 | 0,76  | 0,09 |
| <b>2025</b> |           |   |            |         |     |    |      |       |      |
| 19/03/2025  | 17140     | 3 | 19/03/2025 | Control | 20  | 4  | 0,20 |       | 0,14 |
| 19/03/2025  | 17140     | 3 | 19/03/2025 | Amitraz | 26  | 25 | 0,96 | 0,95  | 0,05 |
| 28/04/2025  | 17140     | 5 | 28/05/2025 | Control | 60  | 1  | 0,02 |       | 0,03 |
| 28/04/2025  | 17140     | 5 | 28/05/2025 | Amitraz | 114 | 72 | 0,63 | 0,63  | 0,14 |
| 23/06/2025  | 26200     | 3 | 26/06/2025 | Control | 45  | 27 | 0,60 |       | 0,07 |
| 23/06/2025  | 26200     | 3 | 26/06/2025 | Amitraz | 45  | 43 | 0,96 | 0,89  | 0,04 |
| 30/06/2025  | 54        | 1 | 01/07/2025 | Control | 40  | 7  | 0,18 |       | 0,10 |
| 30/06/2025  | 54        | 1 | 01/07/2025 | Amitraz | 30  | 14 | 0,47 | 0,35  | 0,12 |
| 08/07/2025  | 25290     | 3 | 09/07/2025 | Control | 60  | 3  | 0,05 |       | 0,06 |
| 08/07/2025  | 25290     | 3 | 09/07/2025 | Amitraz | 60  | 57 | 0,95 | 0,95  | 0,03 |
| 15/07/2025  | 91830     | 3 | 17/07/2025 | Control | 60  | 4  | 0,07 |       | 0,05 |
| 15/07/2025  | 91830     | 3 | 17/07/2025 | Amitraz | 60  | 52 | 0,87 | 0,86  | 0,05 |
| 15/07/2025  | 39570     | 5 | 17/07/2025 | Control | 60  | 20 | 0,33 |       | 0,12 |

|            |           |    |            |         |     |     |      |       |      |
|------------|-----------|----|------------|---------|-----|-----|------|-------|------|
| 15/07/2025 | 39570     | 5  | 17/07/2025 | Amitraz | 60  | 48  | 0,80 | 0,70  | 0,09 |
| 15/07/2025 | 25220     | 3  | 18/07/2025 | Control | 60  | 5   | 0,08 |       | 0,10 |
| 15/07/2025 | 25220     | 3  | 18/07/2025 | Amitraz | 60  | 41  | 0,68 | 0,65  | 0,08 |
| 21/07/2025 | 88130     | 7  | 22/07/2025 | Control | 60  | 17  | 0,28 |       | 0,15 |
| 21/07/2025 | 88130     | 7  | 22/07/2025 | Amitraz | 60  | 55  | 0,92 | 0,88  | 0,06 |
| 21/07/2025 | 88270     | 7  | 23/07/2025 | Control | 60  | 3   | 0,05 |       | 0,03 |
| 21/07/2025 | 88270     | 7  | 23/07/2025 | Amitraz | 60  | 32  | 0,53 | 0,51  | 0,05 |
| 22/07/2025 | 18240     | 3  | 23/07/2025 | Control | 60  | 10  | 0,17 |       | 0,07 |
| 22/07/2025 | 18240     | 3  | 23/07/2025 | Amitraz | 60  | 47  | 0,78 | 0,74  | 0,03 |
| 28/07/2025 | 45300     | 2  | 29/07/2025 | Control | 60  | 7   | 0,12 |       | 0,06 |
| 28/07/2025 | 45300     | 2  | 29/07/2025 | Amitraz | 60  | 56  | 0,93 | 0,92  | 0,00 |
| 28/07/2025 | 18340     | 2  | 29/07/2025 | Control | 60  | 24  | 0,40 |       | 0,16 |
| 28/07/2025 | 18340     | 2  | 29/07/2025 | Amitraz | 60  | 25  | 0,42 | 0,03  | 0,10 |
| 28/07/2025 | 57480     | 4  | 30/07/2025 | Control | 45  | 7   | 0,16 |       | 0,08 |
| 28/07/2025 | 57480     | 4  | 30/07/2025 | Amitraz | 30  | 12  | 0,40 | 0,29  | 0,09 |
| 29/07/2025 | 45300     | 3  | 31/07/2025 | Control | 45  | 7   | 0,16 |       | 0,04 |
| 29/07/2025 | 45300     | 3  | 31/07/2025 | Amitraz | 60  | 16  | 0,27 | 0,13  | 0,24 |
| 29/07/2025 | 21        | NA | 30/07/2025 | Control | 60  | 10  | 0,17 |       | 0,14 |
| 29/07/2025 | 21        | NA | 30/07/2025 | Amitraz | 45  | 4   | 0,09 | -0,09 | 0,10 |
| 30/07/2025 | 18800     | 3  | 31/07/2025 | Control | 60  | 4   | 0,07 |       | 0,05 |
| 30/07/2025 | 18800     | 3  | 31/07/2025 | Amitraz | 60  | 6   | 0,10 | 0,04  | 0,07 |
| 04/08/2025 | 25580     | 1  | 05/08/2025 | Control | 60  | 15  | 0,25 |       | 0,10 |
| 04/08/2025 | 25580     | 1  | 05/08/2025 | Amitraz | 60  | 14  | 0,23 | -0,02 | 0,13 |
| 04/08/2025 | 52320     | 5  | 05/08/2025 | Control | 60  | 7   | 0,12 |       | 0,11 |
| 04/08/2025 | 52320     | 5  | 05/08/2025 | Amitraz | 60  | 18  | 0,30 | 0,21  | 0,09 |
| 03/08/2025 | 32810     | 1  | 05/08/2025 | Control | 45  | 7,5 | 0,17 |       | 0,07 |
| 03/08/2025 | 32810     | 1  | 05/08/2025 | Amitraz | 15  | 8   | 0,53 | 0,44  | NA   |
| 04/08/2025 | 36210     | 6  | 05/08/2025 | Control | 60  | 8   | 0,13 |       | 0,14 |
| 04/08/2025 | 36210     | 6  | 05/08/2025 | Amitraz | 60  | 5   | 0,08 | -0,06 | 0,06 |
| 04/08/2025 | 78150     | 3  | 06/08/2025 | Control | 60  | 6   | 0,10 |       | 0,09 |
| 04/08/2025 | 78150     | 3  | 06/08/2025 | Amitraz | 60  | 3   | 0,05 | -0,06 | 0,06 |
| 05/08/2025 | 67220     | 5  | 06/08/2025 | Control | 60  | 32  | 0,53 |       | 0,11 |
| 05/08/2025 | 67220     | 5  | 06/08/2025 | Amitraz | 60  | 44  | 0,73 | 0,43  | 0,09 |
| 05/08/2025 | 49490     | NA | 06/08/2025 | Control | 60  | 11  | 0,18 |       | 0,10 |
| 05/08/2025 | 49490     | NA | 06/08/2025 | Amitraz | 45  | 27  | 0,60 | 0,51  | 0,18 |
| 06/08/2025 | 45450     | 3  | 07/08/2025 | Control | 60  | 9   | 0,15 |       | 0,10 |
| 06/08/2025 | 45450     | 3  | 07/08/2025 | Amitraz | 60  | 38  | 0,63 | 0,57  | 0,13 |
| 11/08/2025 | 39230     | NA | 12/08/2025 | Control | 75  | 14  | 0,19 |       | 0,10 |
| 11/08/2025 | 39230     | NA | 12/08/2025 | Amitraz | 60  | 21  | 0,35 | 0,20  | 0,10 |
| 11/08/2025 | 25870     | NA | 12/08/2025 | Control | 60  | 2   | 0,03 |       | 0,07 |
| 11/08/2025 | 25870     | NA | 12/08/2025 | Amitraz | 60  | 8   | 0,13 | 0,10  | 0,12 |
| 11/08/2025 | 36100     | 2  | 12/08/2025 | Control | 60  | 15  | 0,25 |       | 0,06 |
| 11/08/2025 | 36100     | 2  | 12/08/2025 | Amitraz | 60  | 24  | 0,40 | 0,20  | 0,28 |
| 12/08/2025 | 45220     | 3  | 13/08/2025 | Control | 60  | 6   | 0,10 |       | 0,09 |
| 12/08/2025 | 45220     | 3  | 13/08/2025 | Amitraz | 50  | 9   | 0,18 | 0,09  | 0,24 |
| 12/08/2025 | 21440 - A | 1  | 13/08/2025 | Control | 60  | 1   | 0,02 |       | 0,03 |
| 12/08/2025 | 21440 - A | 1  | 13/08/2025 | Amitraz | 60  | 3   | 0,05 | 0,03  | 0,03 |
| 12/08/2025 | 21440 - B | 1  | 13/08/2025 | Control | 47  | 3   | 0,06 |       | 0,07 |
| 12/08/2025 | 21440 - B | 1  | 13/08/2025 | Amitraz | 60  | 36  | 0,60 | 0,57  | 0,09 |
| 18/08/2025 | 36210     | 3  | 19/08/2025 | Control | 60  | 2   | 0,03 |       | 0,04 |
| 18/08/2025 | 36210     | 3  | 19/08/2025 | Amitraz | 120 | 60  | 0,50 | 0,48  | 0,18 |
| 19/08/2025 | 45340     | 2  | 20/08/2025 | Control | 40  | 6   | 0,15 |       | 0,06 |
| 19/08/2025 | 45340     | 2  | 20/08/2025 | Amitraz | 40  | 19  | 0,48 | 0,38  | 0,10 |
| 25/08/2025 | 48170     | 1  | 26/08/2025 | Control | 75  | 3   | 0,04 |       | 0,04 |
| 25/08/2025 | 48170     | 1  | 26/08/2025 | Amitraz | 60  | 36  | 0,60 | 0,58  | 0,12 |
| 26/08/2025 | 37600     | 3  | 27/08/2025 | Control | 75  | 4   | 0,05 |       | 0,03 |
| 26/08/2025 | 37600     | 3  | 27/08/2025 | Amitraz | 60  | 59  | 0,98 | 0,98  | 0,03 |
| 03/09/2025 | 36100     | 2  | 05/09/2025 | Control | 60  | 2   | 0,03 |       | 0,04 |
| 03/09/2025 | 36100     | 2  | 05/09/2025 | Amitraz | 61  | 58  | 0,95 | 0,95  | 0,06 |
